# Supplementary material
Source: PubMed Central journal article supplement (PMC3778429)
Supplement: cn400105d_si_001.pdf [file cn400105d_si_001.pdf]

**Inhibition of the Fe(III)-Catalyzed Dopamine Oxidation by ATP and Its Relevance  
to Oxidative Stress in Parkinson's Disease**

Dianlu Jiang, Shuyun Shi, Lin Zhang, Lin Liu, Bingrong Ding, Bingqing  
Zhao, Gargey Yagnik, Feimeng Zhou<sup>†</sup>

*Department of Chemistry and Biochemistry, California State University,  
Los Angeles, Los Angeles, California 90032*

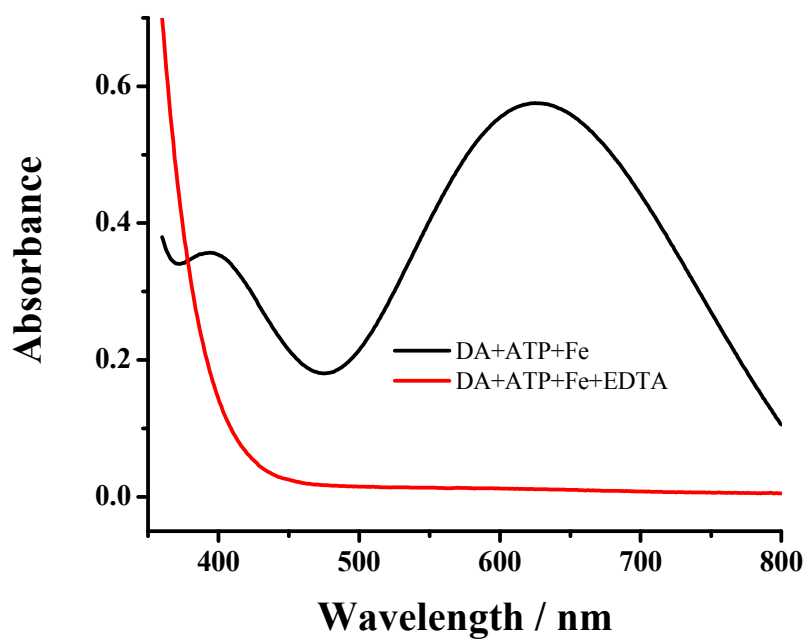

Figure S1. UV-vis spectrum of DA, ATP and Fe(III) (1 mM each) showing the characteristic peak corresponding to the ternary complex and the spectrum of the same mixture in the presence of 1 mM EDTA.
